# Supplementary material
Source: publisher figshare collection journal article supplement (https://wiley.figshare.com/articles/dataset/_/3519350)
Supplement: Supplementary file 1 [file 1]

Ralph Grundel, Krystalynn J. Frohnapple, David N. Zaya, Gary A. Glowacki, Chelsea J. Weiskerger, Tamatha A. Patterson, and Noel B. Pavlovic. 20XX. Geographic coincidence of richness, mass, conservation value, and response to climate of U.S. land birds. *Ecological Applications* VOL:pp–pp

APPENDIX E: Enlarged versions of maps from Figs. 5 and 6.

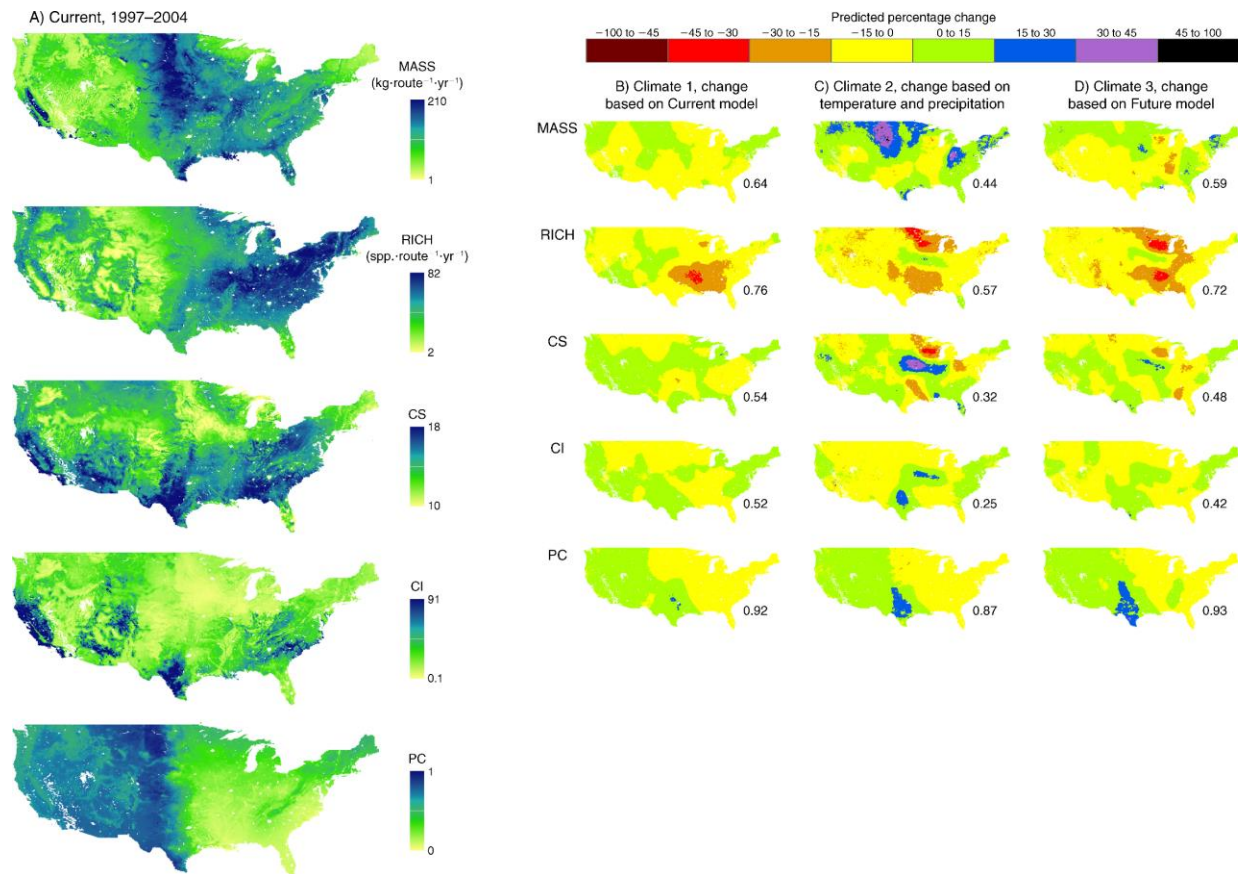

FIG. E1. Original Figure 5. Original Caption:

Fig. 5. Distribution of five avian community characteristics across the United States: bird mass (kg per BBS route per year), richness (number of species per BBS route), high combined scores (CS), conservation index (CI; values shown have been multiplied by 10<sup>5</sup>), and principal curve (PC) scores. (A) Current (1997–2004) characteristic scores across the lower 48 states. (B–D) Predicted percentage change (color codes in the large key), as a percentage of the Current characteristic range, from Current to 2080 predictions. Projections are based on Climate 1 (change predictions based on current values for non-climate variables) for (B); Climate 2

(change predictions based on temperature and precipitation only) for (C); and Climate 3 (Future model: change predictions based on predictors including projected future gross primary productivity and MaxHab, the percentage of a route covered by the most common land cover type) for (D). To the right of each map in (B–D) is the adjusted geographically weighted regression (GWR) model  $R^2$  value.

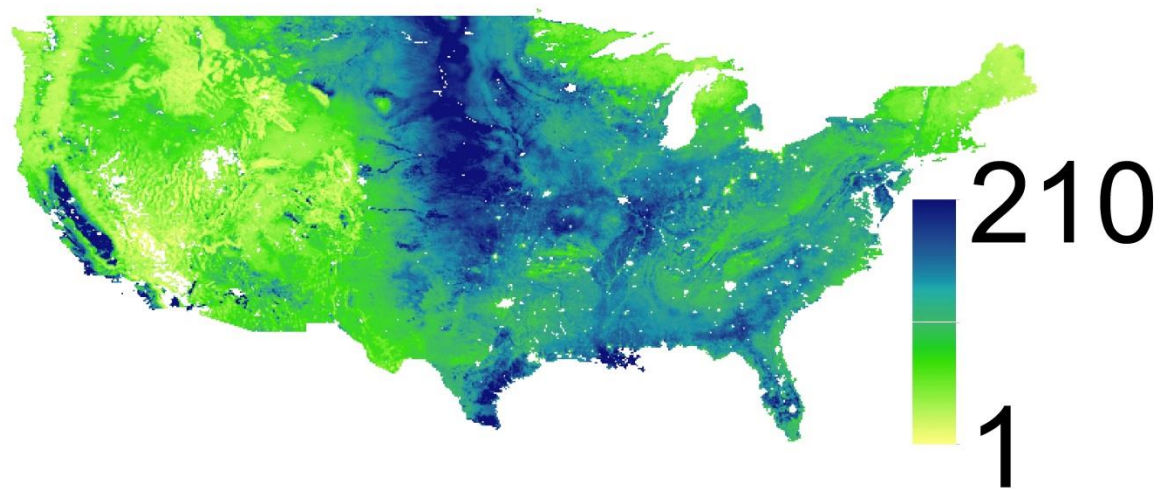

FIG. E2. MASS: Current Model enlarged from Fig. E1.

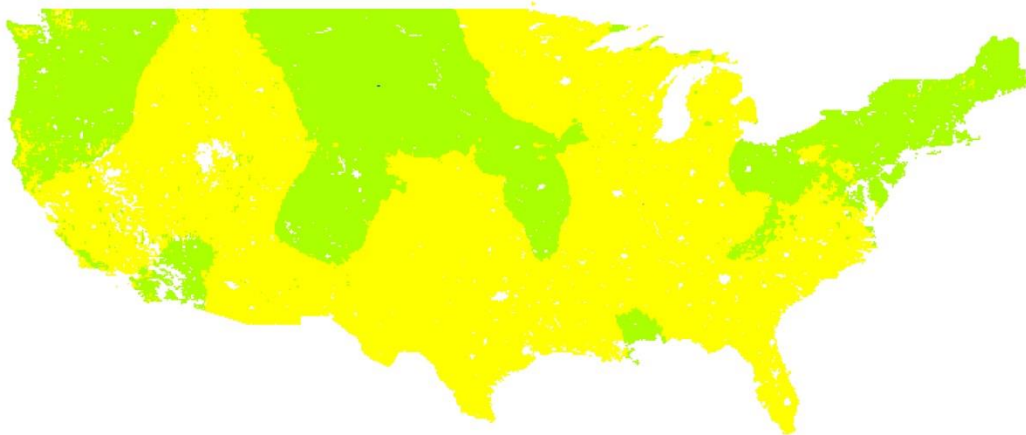

FIG. E3. MASS: Change Current Model enlarged from Fig. E1.

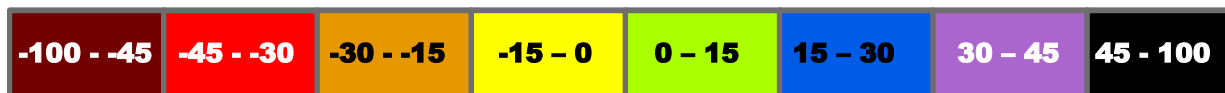

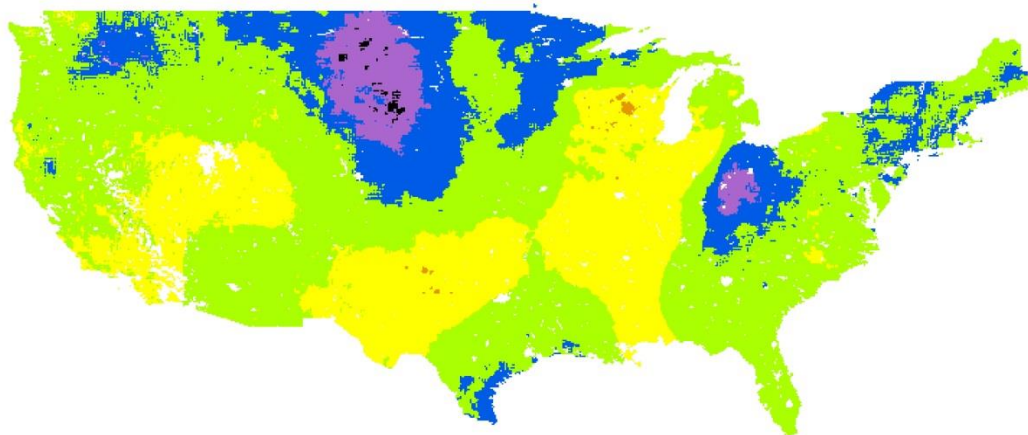

FIG. E4. MASS: Change Temperature Precipitation Model enlarged from Fig. E1.

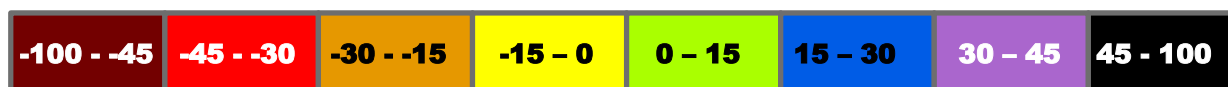

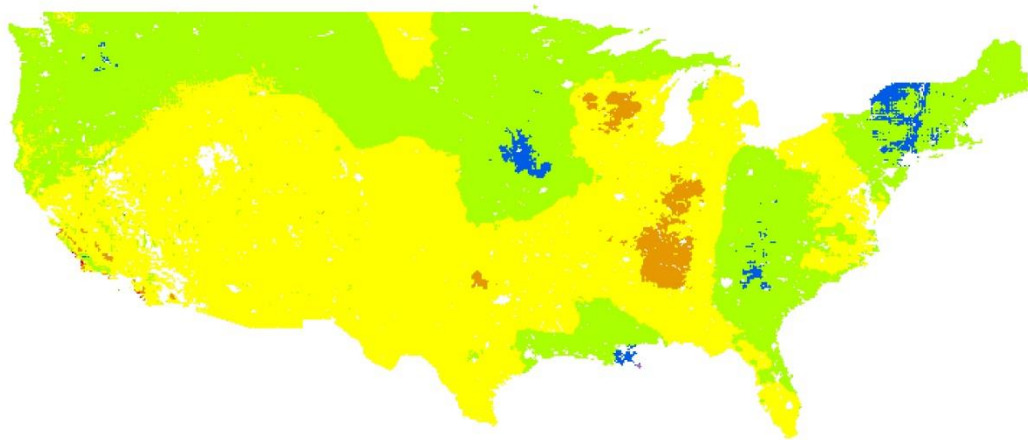

FIG. E5. MASS: Change Future Model enlarged from Fig. E1.

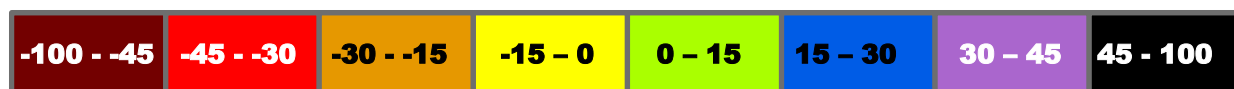

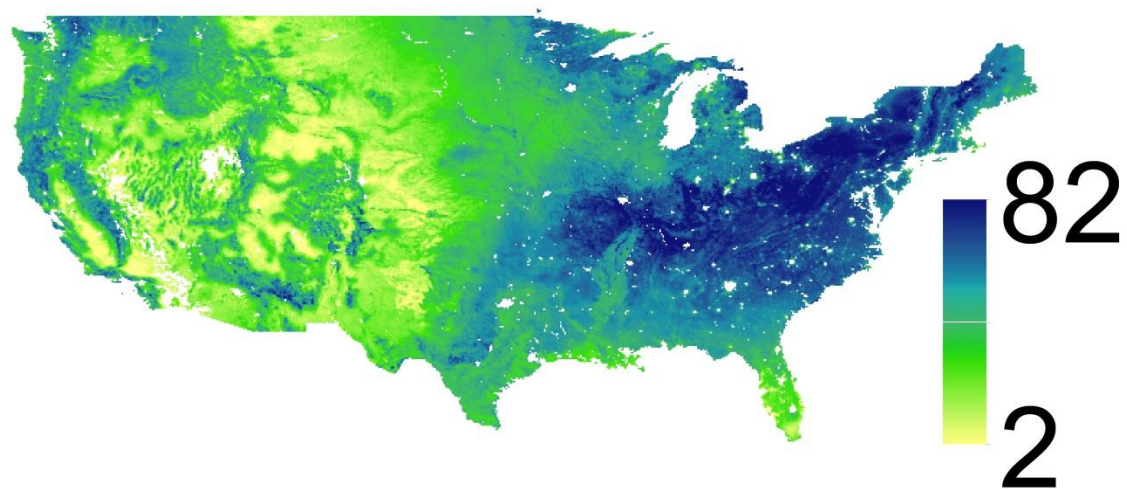

FIG. E6. RICH: Current model enlarged from Fig. E1.

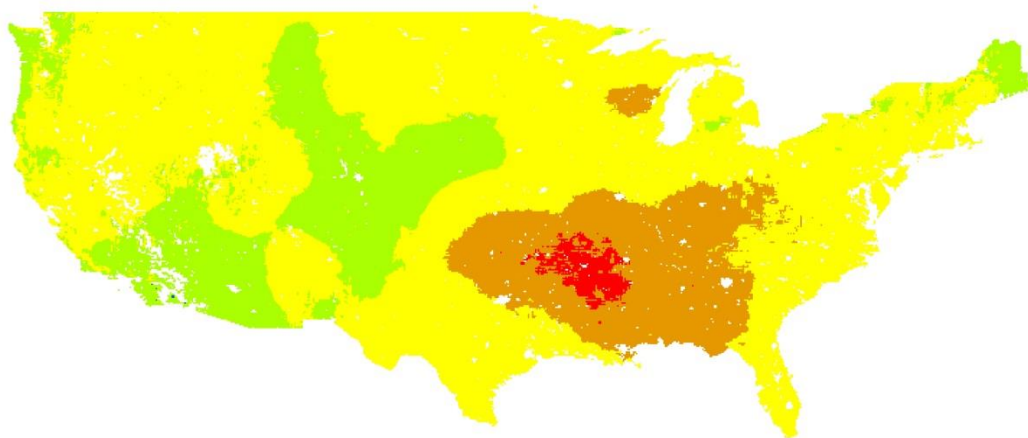

FIG. E7. RICH: Change Current Model enlarged from Fig. E1.

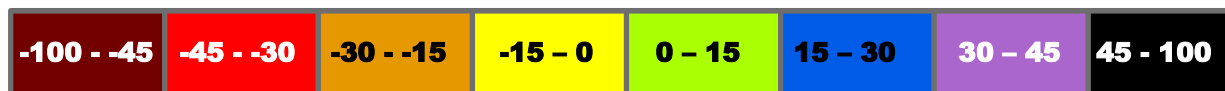



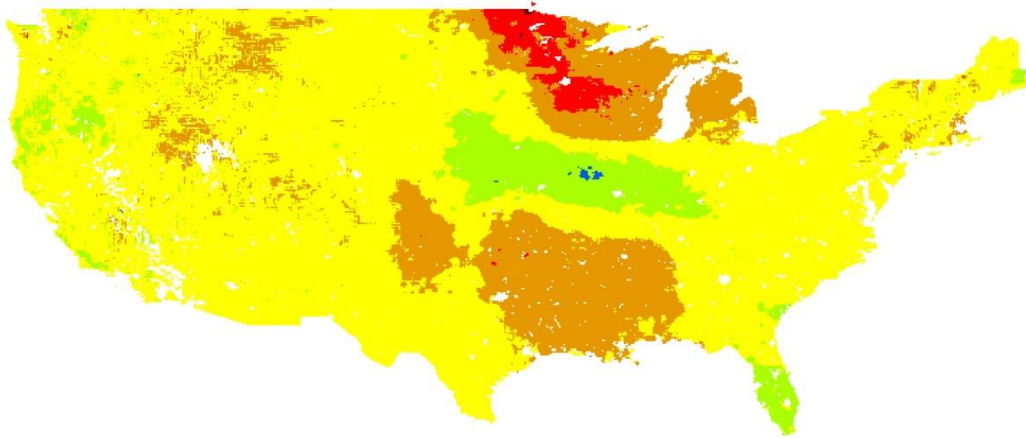

FIG. E8. RICH: Change Temperature Precipitation Model enlarged from Fig. E1.

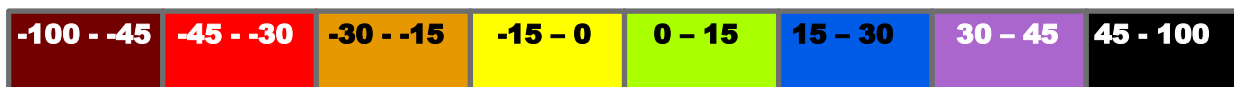

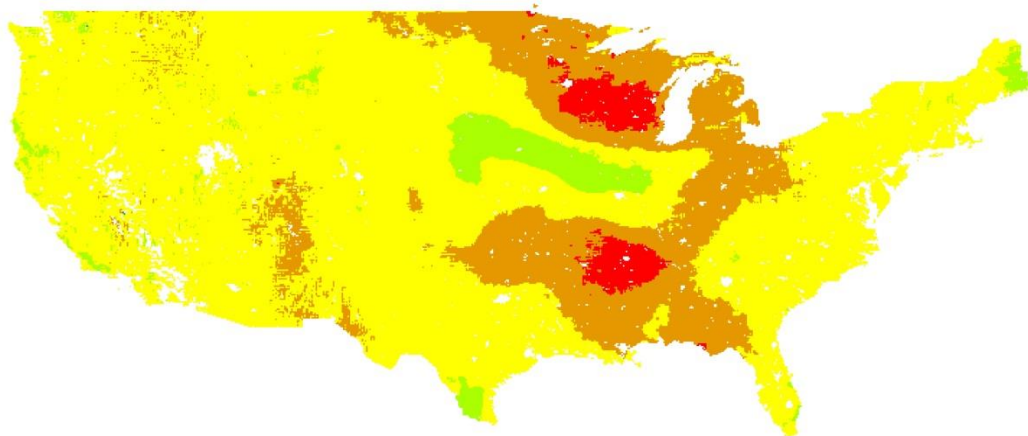

FIG. E9. RIC: Change Future Model enlarged from Fig. E1.

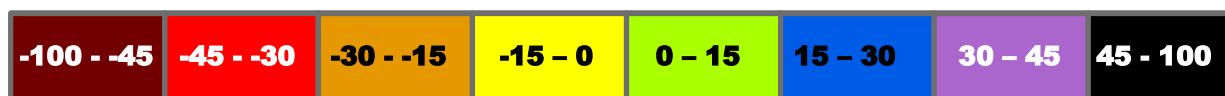

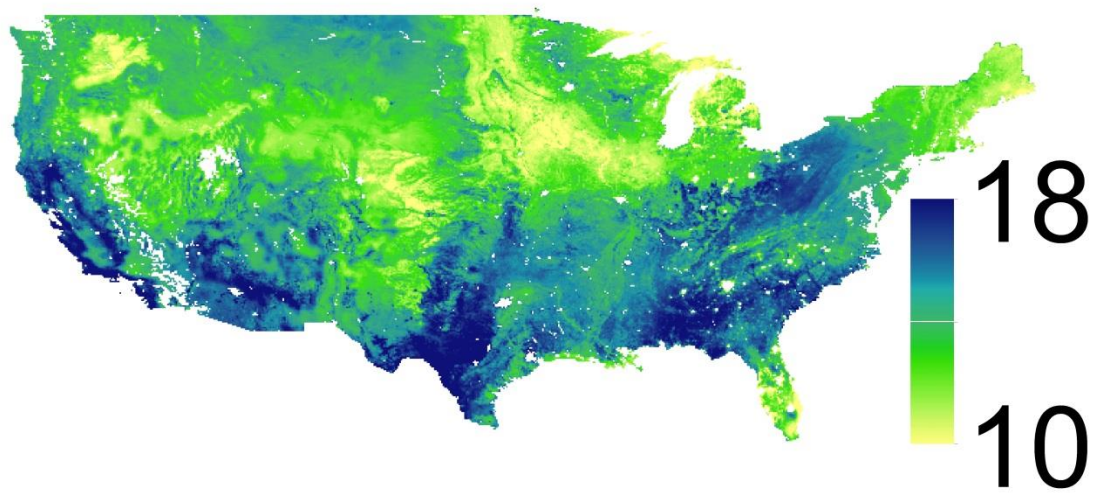

FIG. E10. CS: Current Model enlarged from Fig. E1.

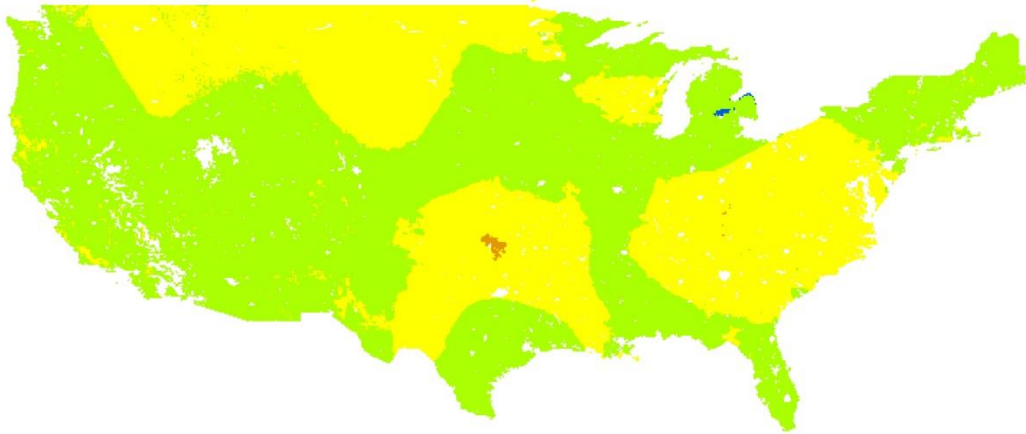

FIG. E11. CS: Change Current Model enlarged from Fig. E1.

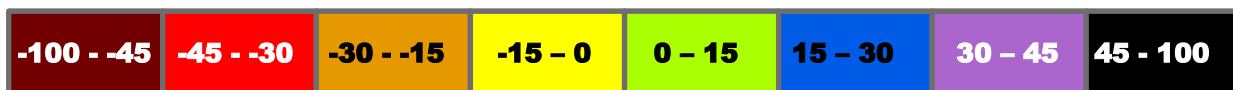

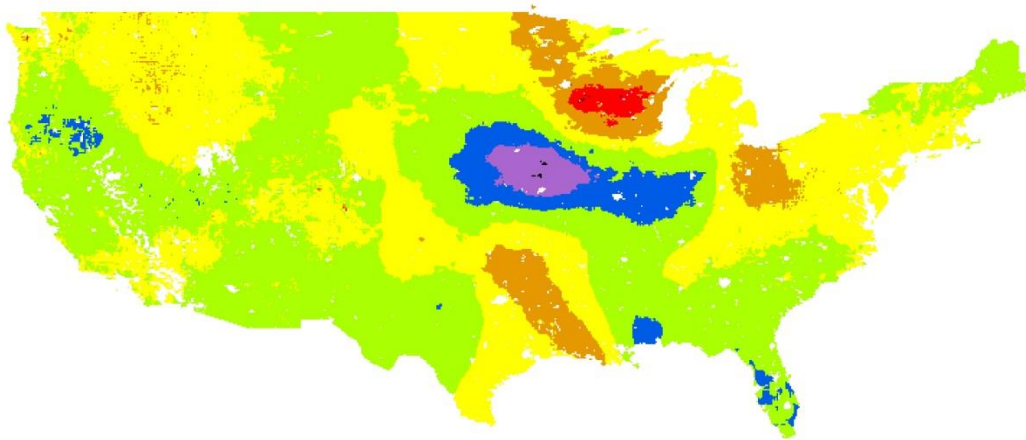

FIG. E12. CS: Change Temperature Precipitation Model enlarged from Fig. E1.

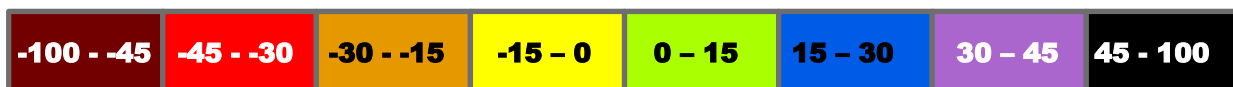

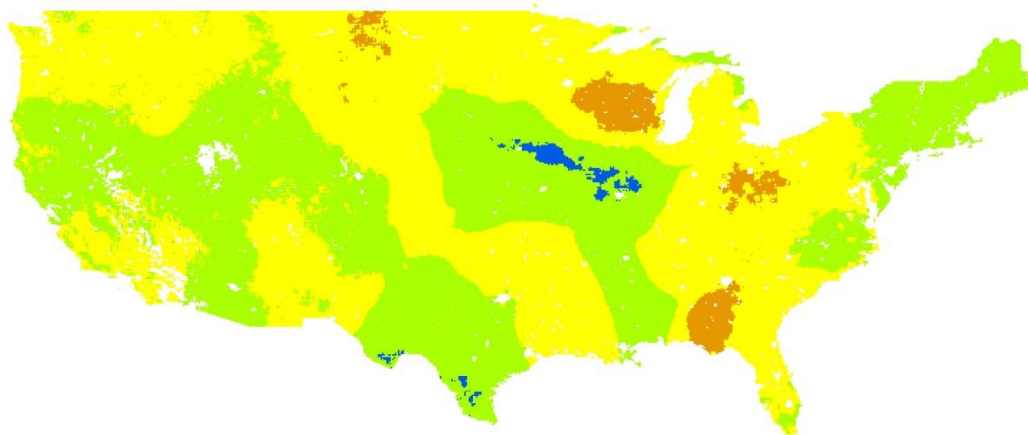

FIG. E13. CS: Change Future Model enlarged from Fig. E1.

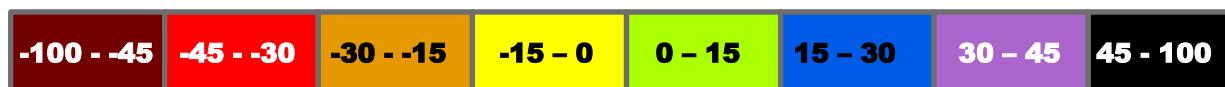

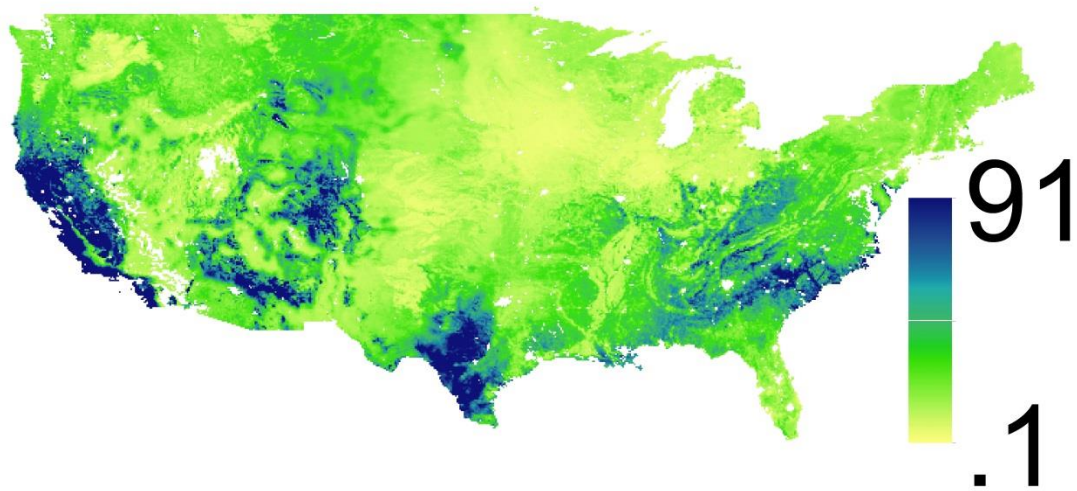

FIG. E14. CI: Current Model enlarged from Fig. E1.

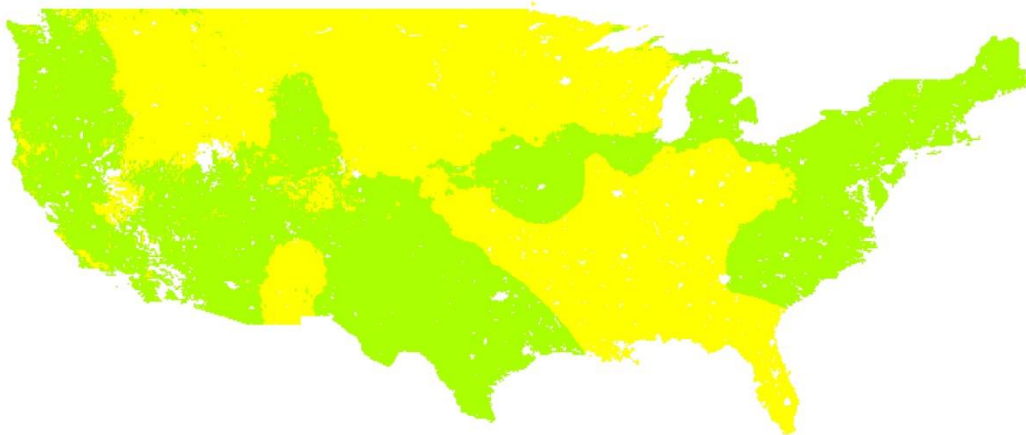

FIG. E15. CI: Change Current Model enlarged from Fig. E1.

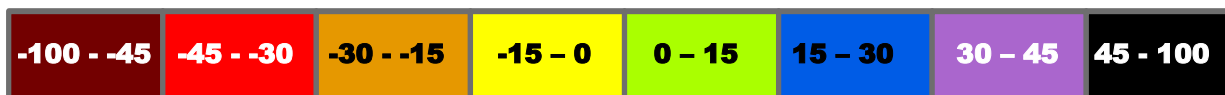



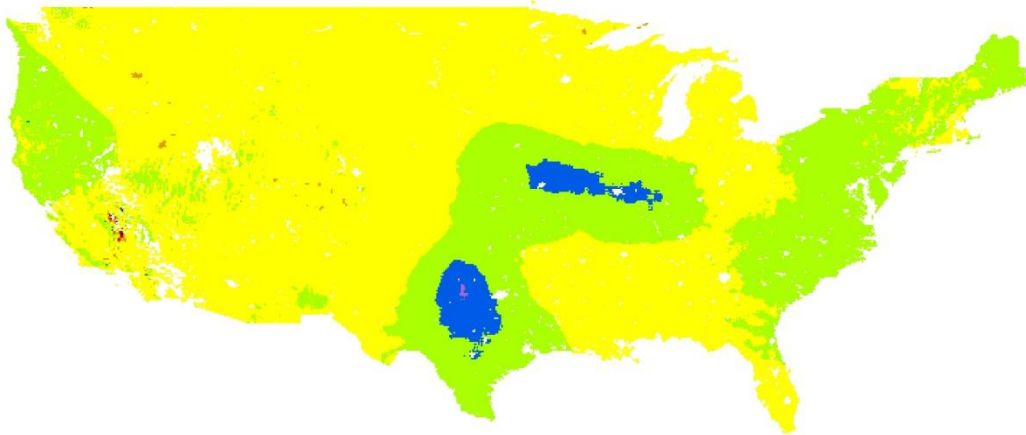

FIG. E16. CI: Change Temperature Precipitation Model enlarged from Fig. E1.

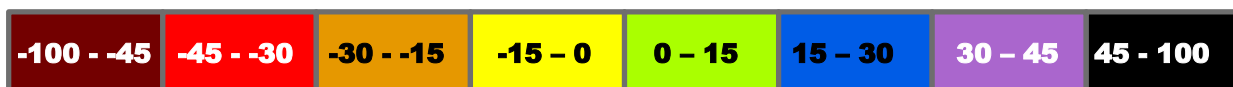

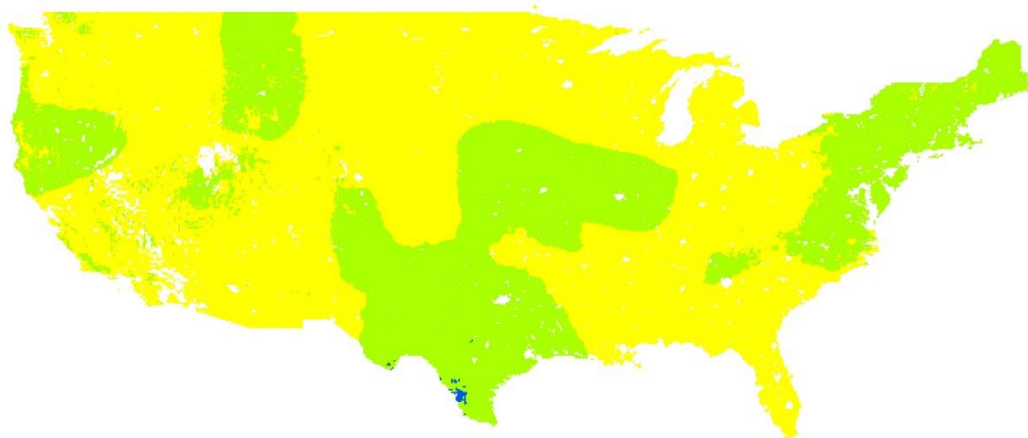

FIG. E17. CI: Change Future Model enlarged from Fig. E1.

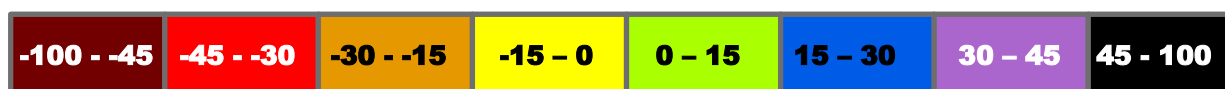

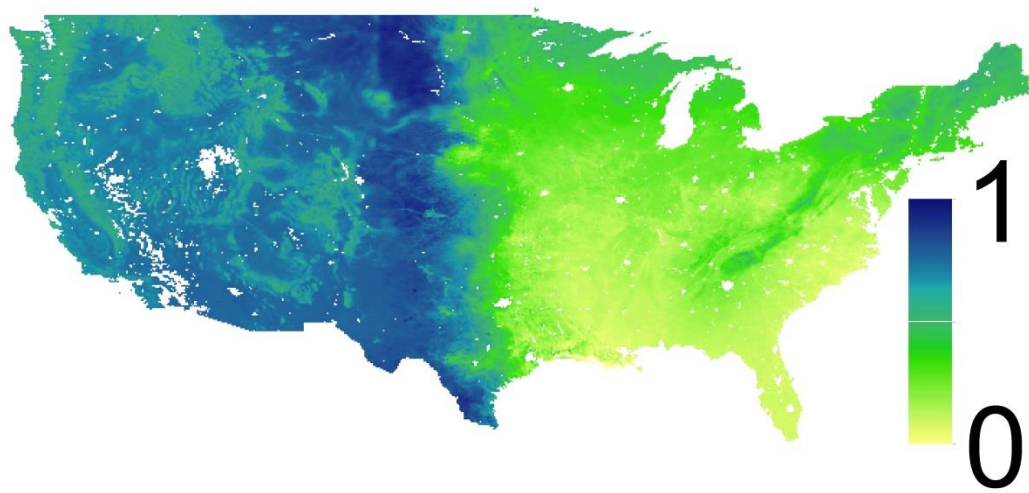

FIG. E18. PC: Current Model enlarged from Fig. E1.

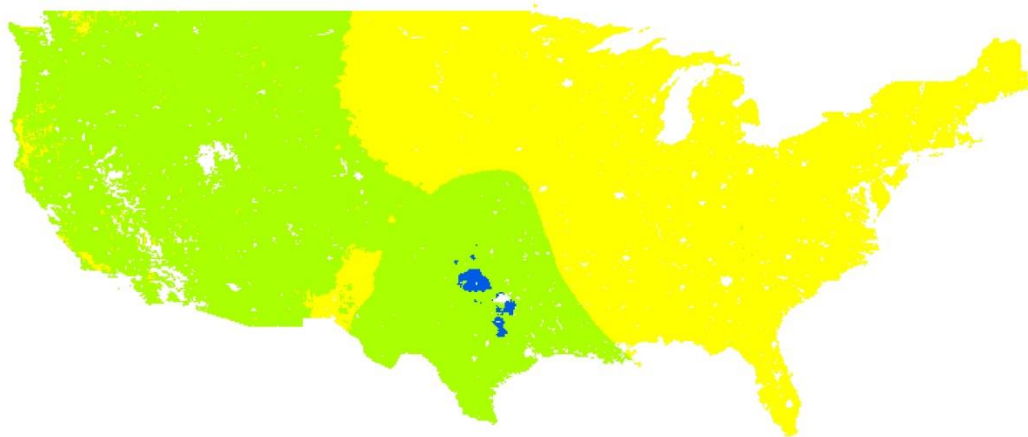

FIG. E19. PC: Change Current Model enlarged from Fig. E1.

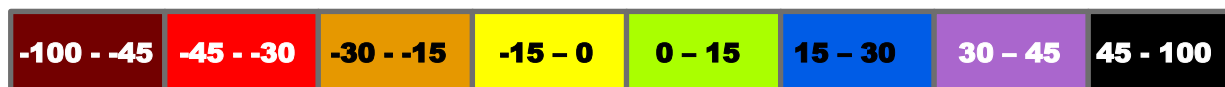

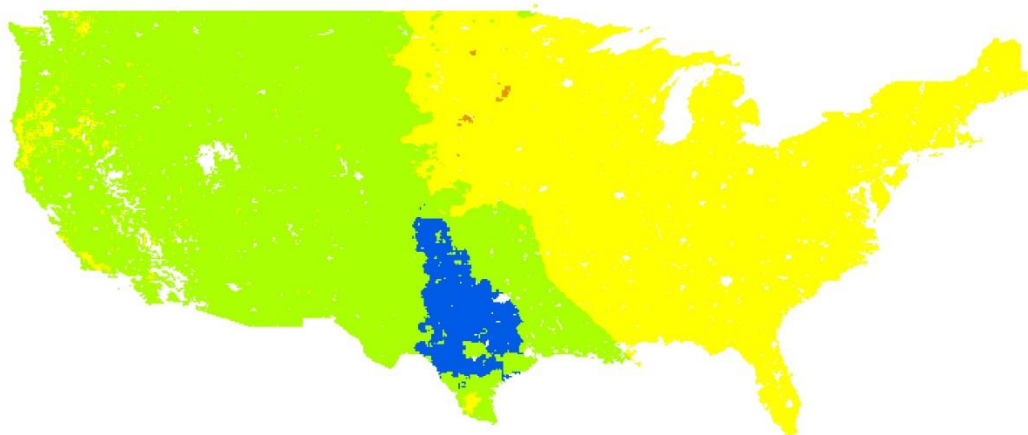

FIG. E20. PC: Change Temperature Precipitation Model enlarged from Fig. E1.

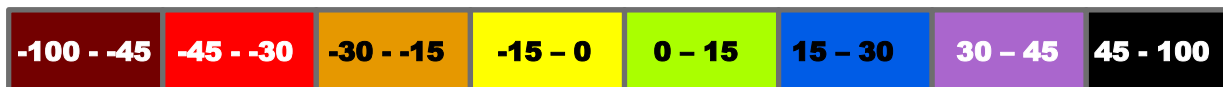

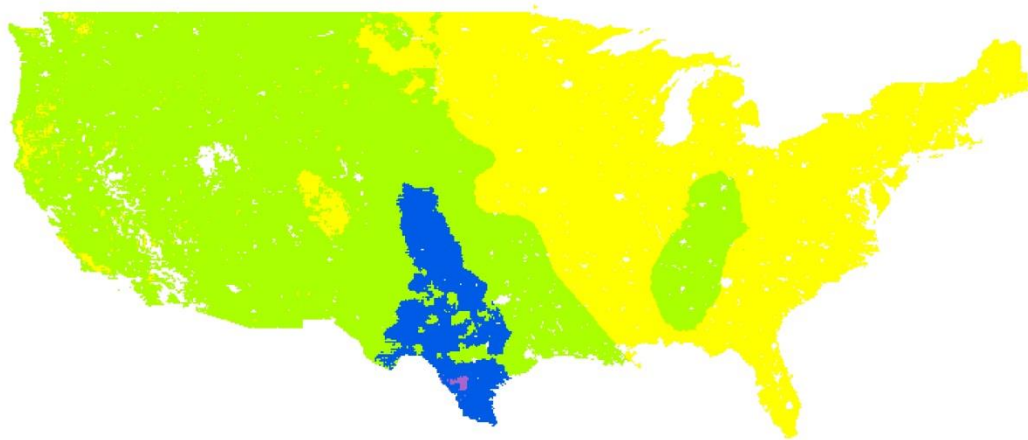

FIG. E21. PC: Change Future Model enlarged from Fig. E1.

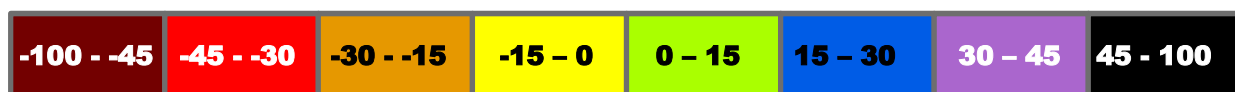

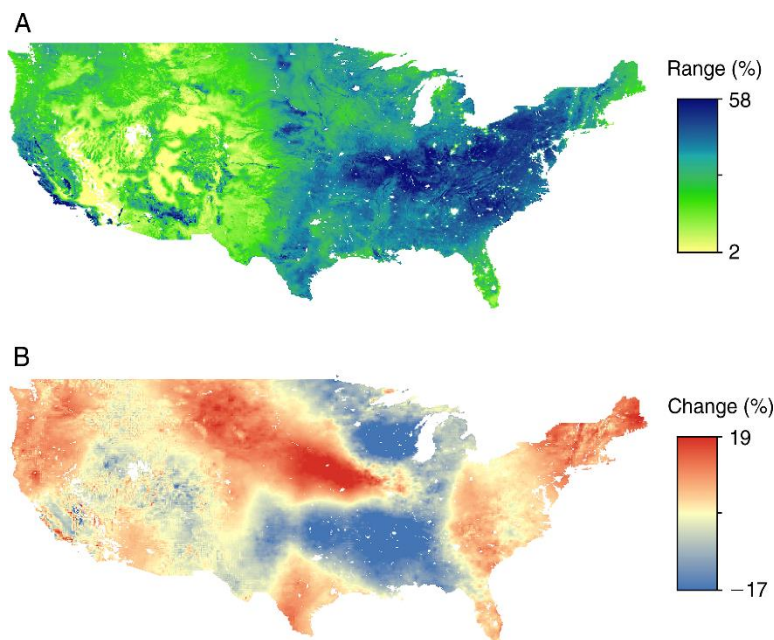

FIG. E22. Original Figure 6.

Original Caption:

Figure 6. (A) Average of MASS, RICH, and CI, each as a percentage of their range. (B) Average percentage increase or decrease of MASS, RICH, and CI from Current to 2080 based on the values averaged from Climate models 1, 2, and 3. Values for each grid cell shown ( $n = 120806$ ) are averaged values of MASS, RICH, and CI, after standardization of the three variables as a fraction of their respective ranges.

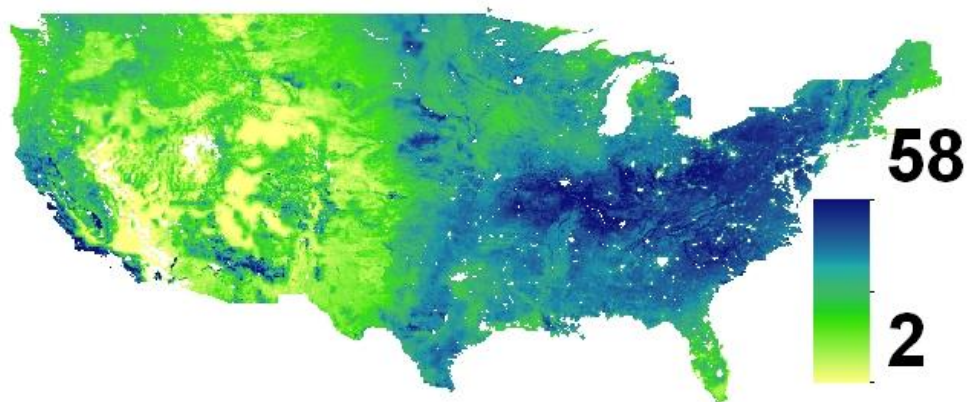

FIG. E23. Original Figure 6. (A) enlarged from Fig. E22.



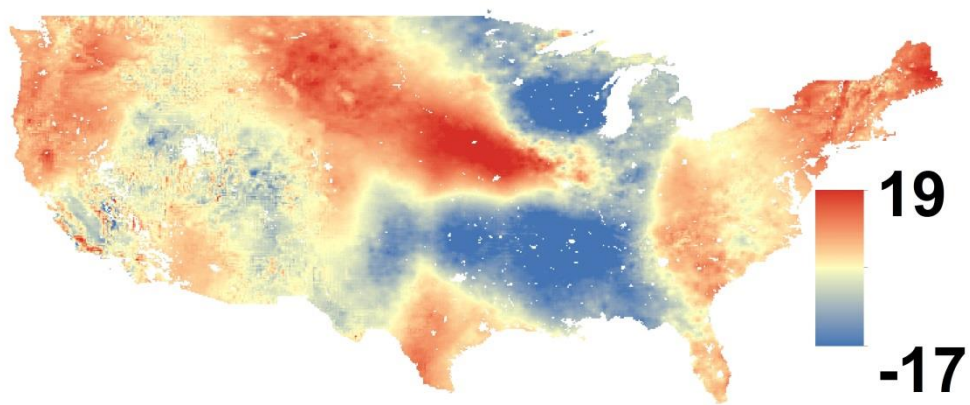

FIG. E24. Original Figure 6. (B) enlarged from Fig. E22.
